# Supplementary material
Source: PubMed Central journal article supplement (PMC3501064)

## SUPPLEMENTAL INFORMATION

### EXPERIMENTAL PROCEDURES

*Cell culture*-CHO/S1P<sub>2</sub> and S1P<sub>4</sub> cells were cultured in  $\alpha$ -minimal essential medium (MEM) containing 10% (v/v) FCS (1). Stable CHO/S1P<sub>5</sub> cell line was generated after transfection with flag-tagged human S1P<sub>5</sub> plasmid, which is kindly gifted from Dr. Kihara (Hokkaido University), and selection with 3  $\mu$ g/ml puromycin. The expression of human S1P<sub>5</sub> was detected by Western blot analysis (data not shown).

### REFERENCES

1. Kohno, T., and Igarashi, Y. (2003) *J Biochem* **134**, 667-673
2. Bligh, E. G., and Dyer, W. J. (1959) *Can J Biochem Physiol* **37**, 911-917

### FIGURE LEGENDS

**Supplemental Fig. S1. Effect of S1P<sub>2</sub> and S1P<sub>4</sub> on counteracting autophagy.** (A) CHO/S1P<sub>2</sub> and CHO/S1P<sub>4</sub> cell lines were cultured in AA(-) with 20  $\mu$ M S1P for indicated time. Activation of ERK2 was detected by Western blot analysis. (B) Cells were cultured in AA(-) or serum free medium (AA(+)) containing 50  $\mu$ M C<sub>2</sub>-ceramide (C<sub>2</sub>-Cer) with or without 10  $\mu$ M S1P for 30 min as described in Fig. 6E. MDC incorporation was examined by fluorescence microscopy, and the density of MDC was calculated. Images were obtained by fluorescent microscopy, and cells having at least five dots were counted as autophagic cells. Values are the mean  $\pm$  SD from three independent experiments.

**Supplemental Fig. S2. Effect of S1P<sub>5</sub> on inhibition of autophagy.** (A) CHO and CHO/S1P<sub>5</sub> cells were cultured in AA(-) with 20  $\mu$ M S1P for indicated time. Akt and ERK2 activations were detected by immunoblotting. (B) Cells were cultured in AA(-) with or without S1P (2 or 20  $\mu$ M) for 30 min. Indicated proteins were detected by Western blot analysis. The data was representative of three independent experiments.

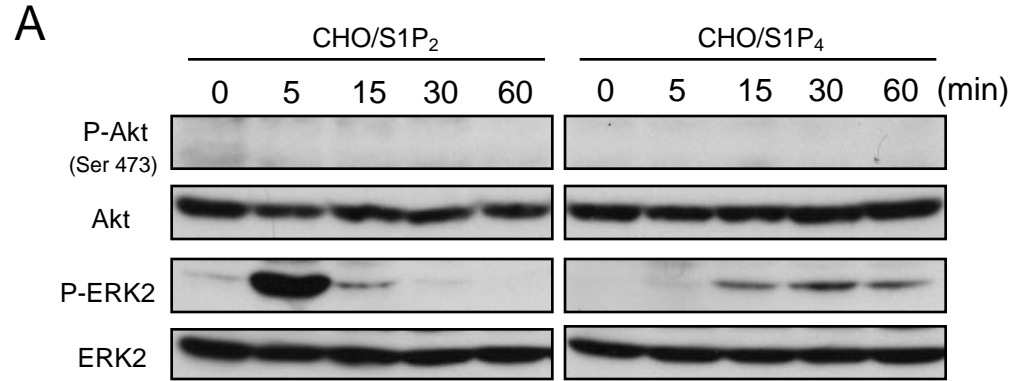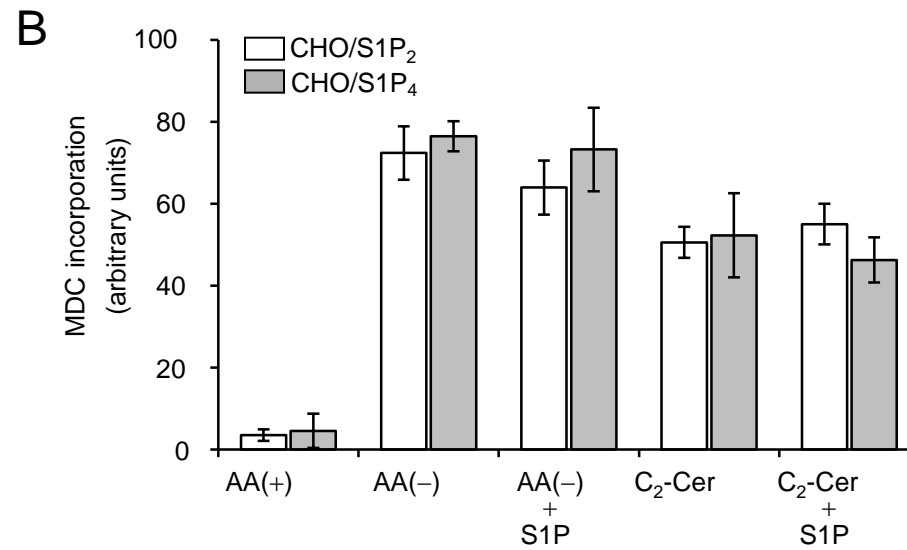

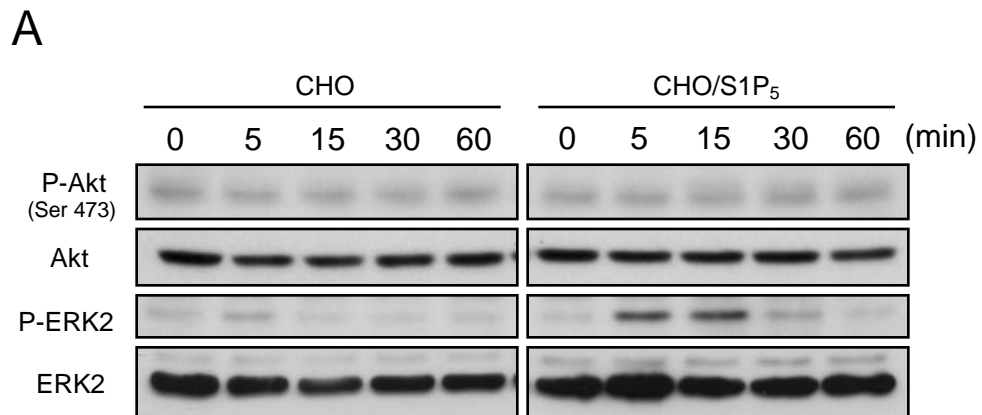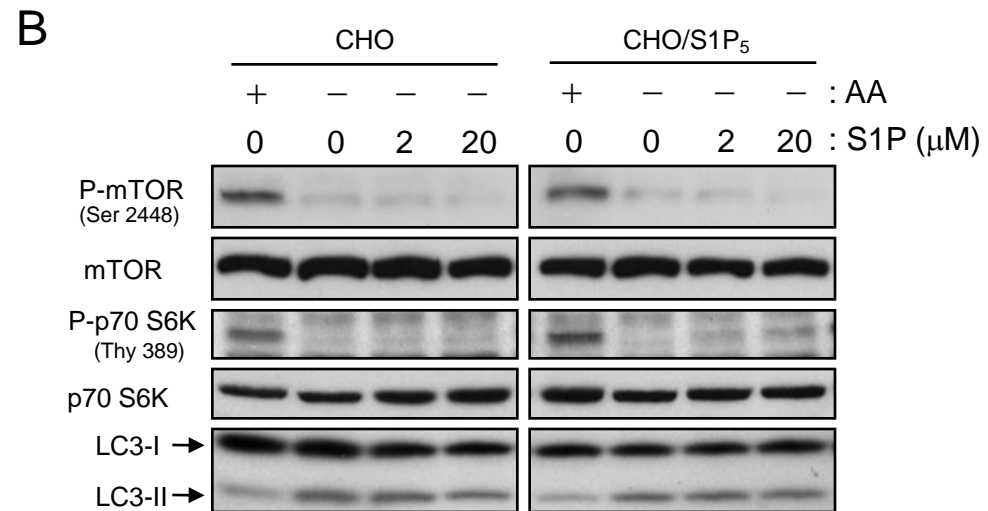

Supplement: supp_M112.416552_jbc.M112.416552-1.pdf [file supp_M112.416552_jbc.M112.416552-1.pdf]
